# Supplementary material for: Anticorrosive assay-guided isolation of active phytoconstituents from Anthemis pseudocotula extracts and a detailed study of their effects on the corrosion of mild steel in acidic media
Source: Royal Society of Chemistry journal article supplement (doi:10.1039/c5ra09154c), 2015-01-01
Supplement: c5ra09154c1.pdf [file c5ra09154c1.pdf]

**Anticorrosive Assay-Guided Isolation of Active Phytoconstituents from  
*Anthemis pseudocotula* Extracts and a Detailed Study of Their Effects on the  
Corrosion of Mild Steel in Acidic Media**

H. Z. Alkathlan\*, M. Khan, M. M. S. Abdullah, A. M. Al-Mayouf,

A. Yacine Badjah-Hadj-Ahmed, Z. A. ALOthman, A. A. Mousa

*Department of Chemistry, College of Science, King Saud University, P.O.Box 2455, Riyadh -  
11451, Saudi Arabia.*

\*To whom correspondence should be addressed: *E-mail: khathlan@ksu.edu.sa*

Tel: +966-1-4675910, Fax: +966-1-4675992.

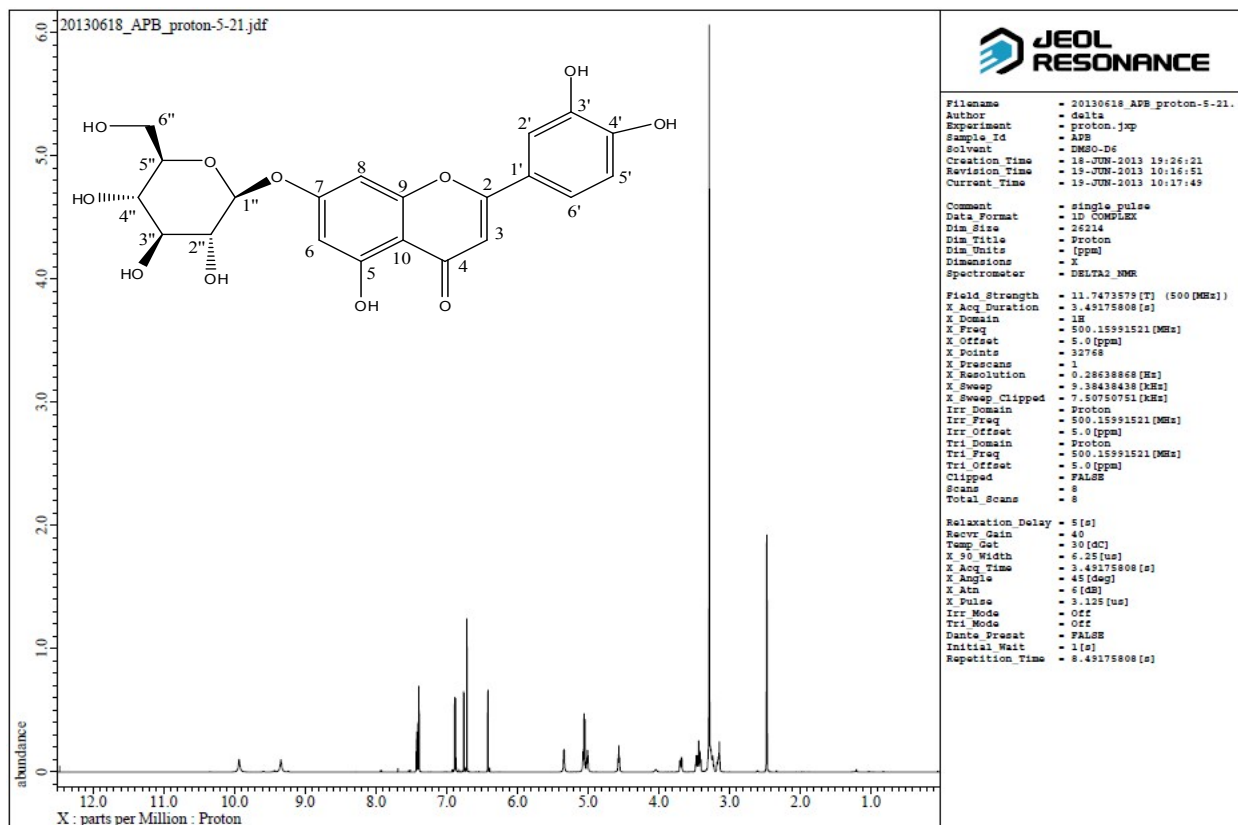

**Fig. S1a.**  $^1\text{H}$  NMR spectrum of luteolin-7-O- $\beta$ -D-glucoside (APB) in  $\text{DMSO-}d_6$ .

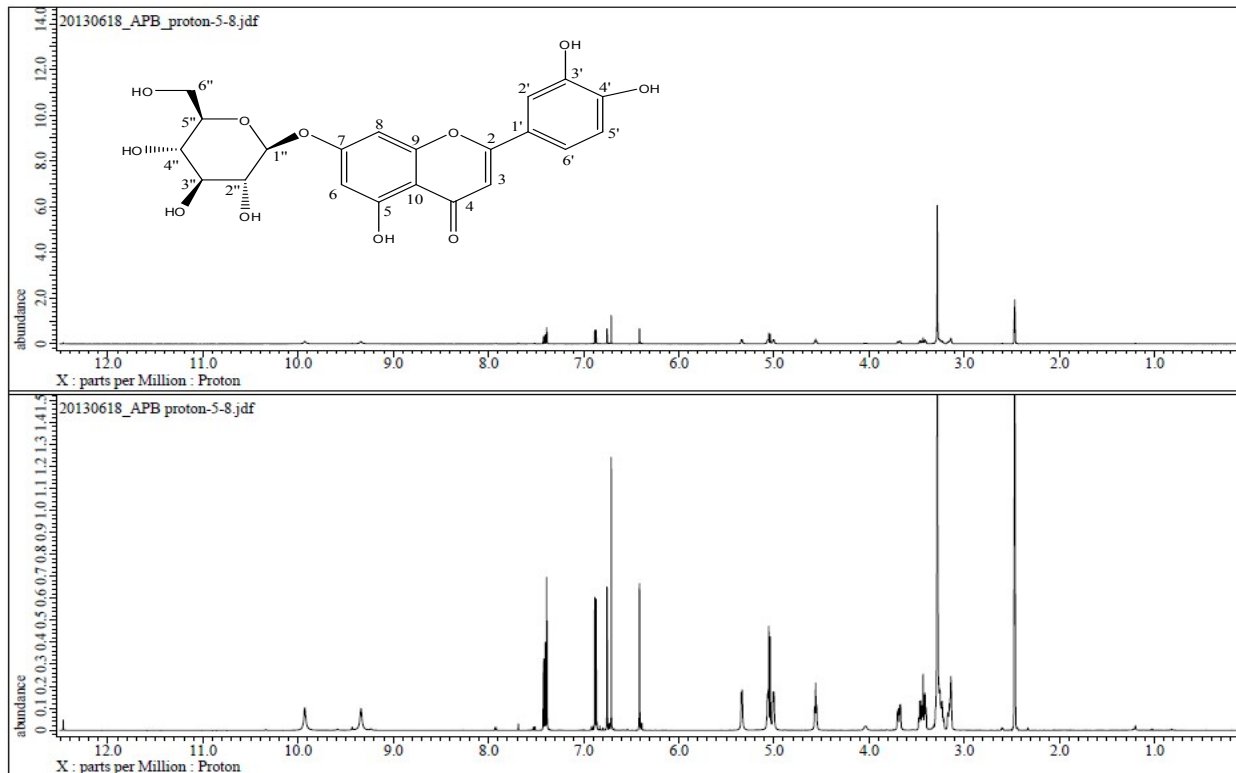

**Fig. S1b.** Expanded  $^1\text{H}$  NMR spectrum of luteolin-7-O- $\beta$ -D-glucoside (APB) in  $\text{DMSO-}d_6$ .

**Fig. S1c.** Expanded  $^1\text{H}$  NMR spectrum of luteolin-7-O- $\beta$ -D-glucoside (APB) in  $\text{DMSO-}d_6$ .

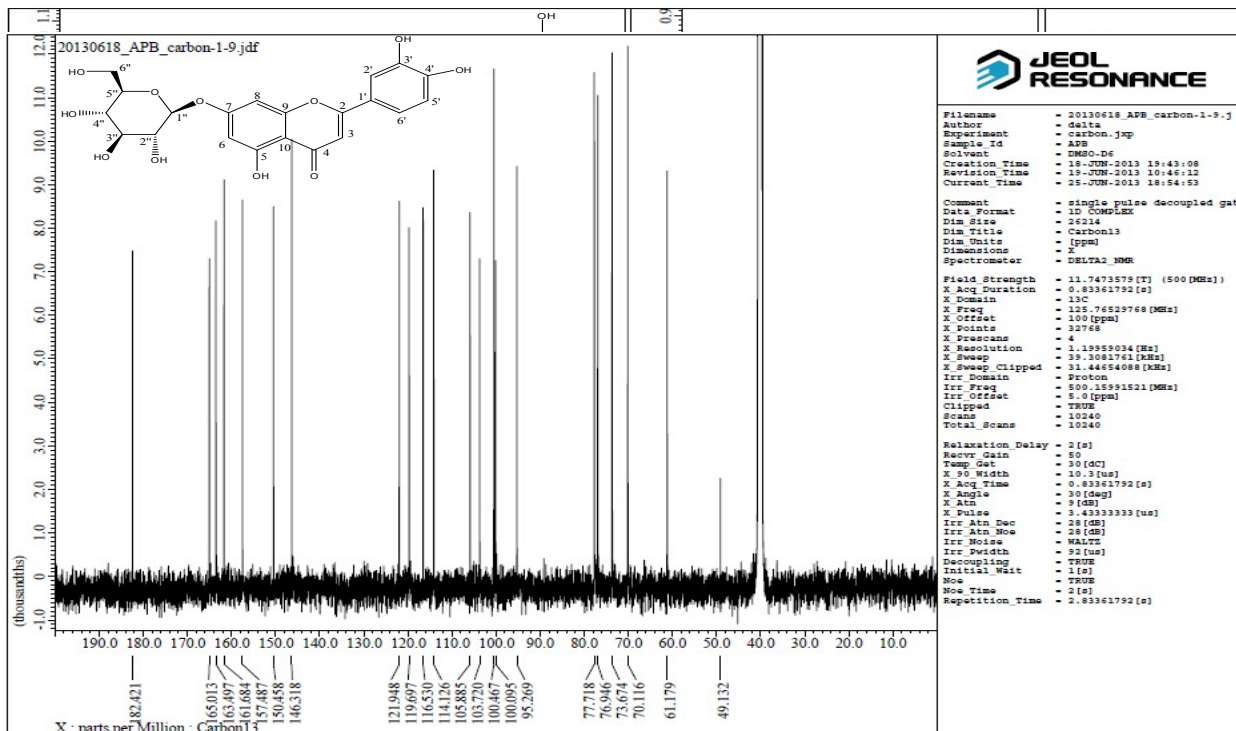

**Fig. S2a.**  $^{13}\text{C}$  NMR spectrum of luteolin-7-O- $\beta$ -D-glucoside (APB) in  $\text{DMSO-}d_6$ .

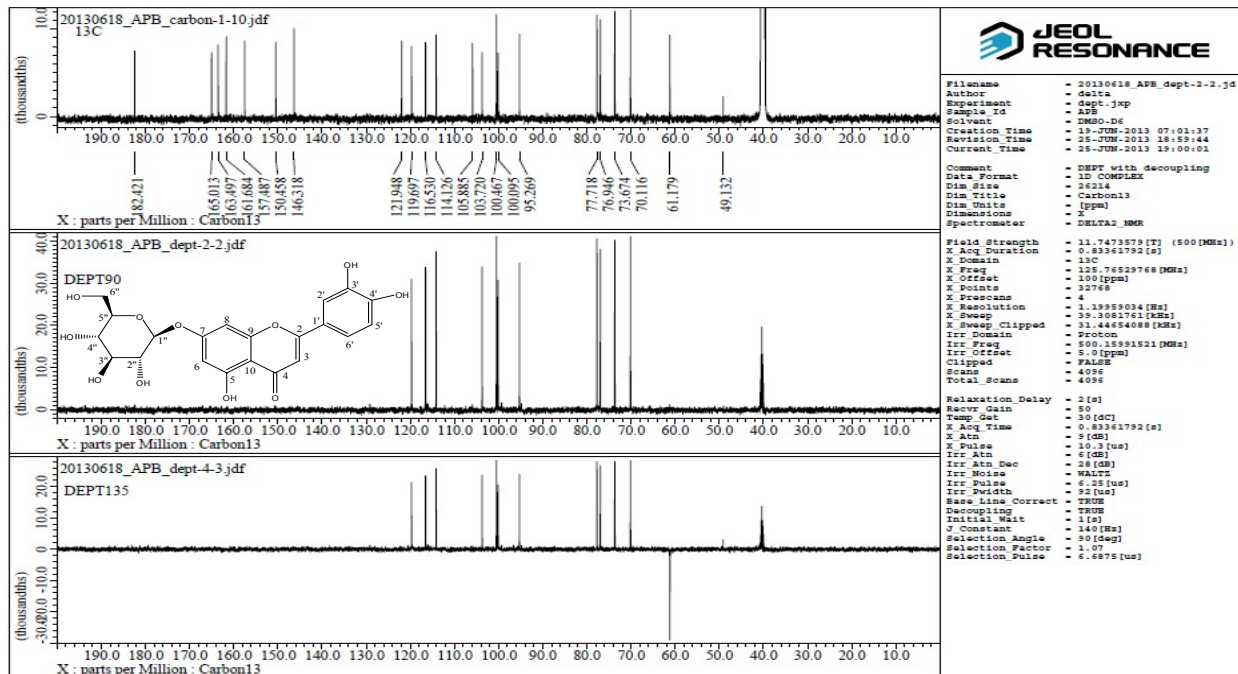

**Fig. S2b.** DEPT spectrum of luteolin-7-O- $\beta$ -D-glucoside (APB) in DMSO- $d_6$ .

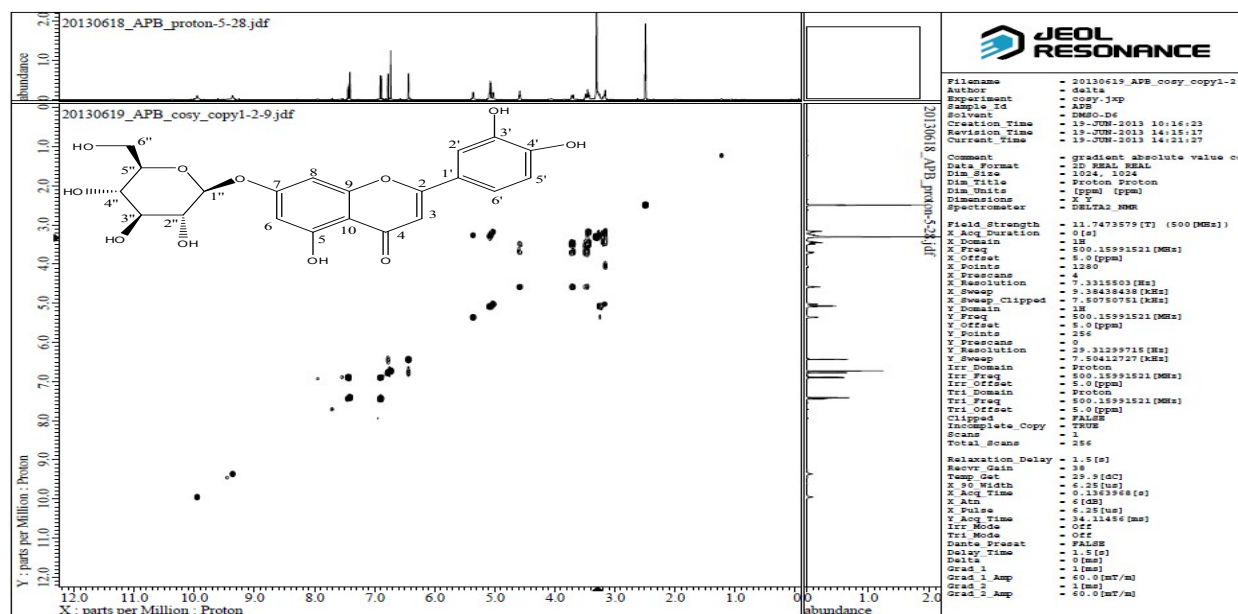

Fig. S3a. COSY spectrum of luteolin-7-O-β-D-glucoside (APB) in DMSO-*d*<sub>6</sub>.

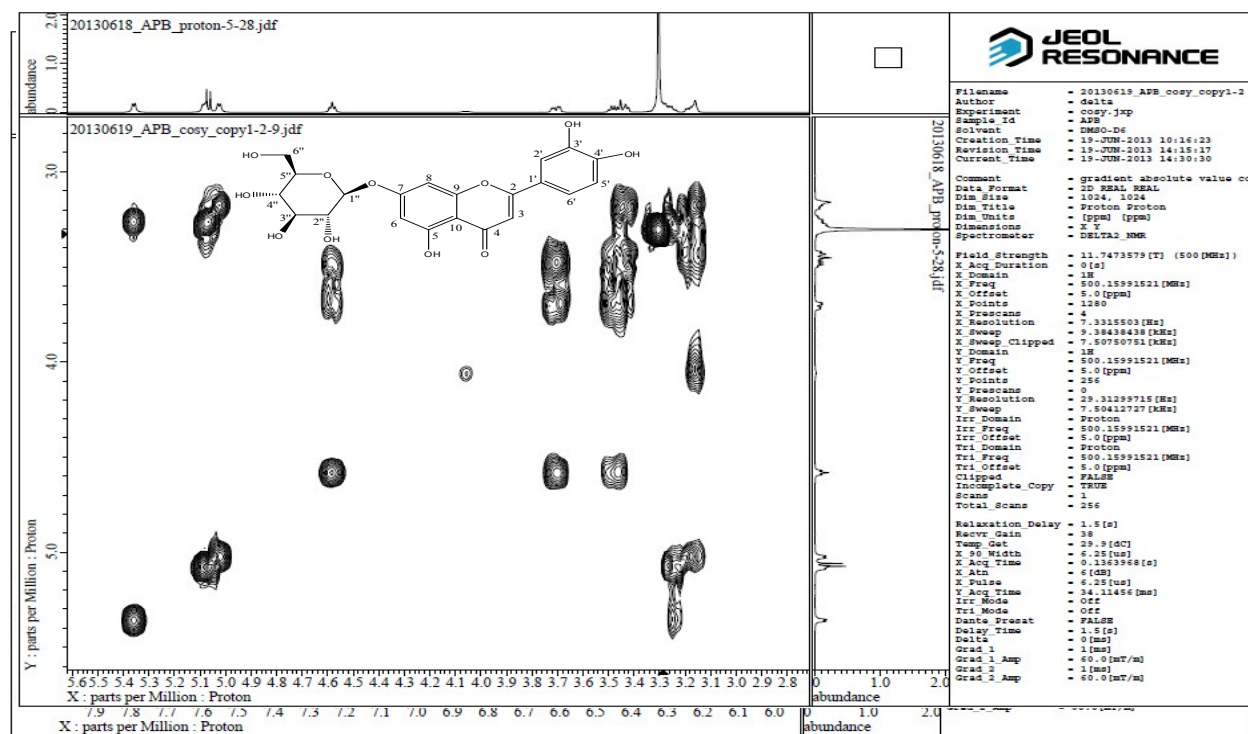

Fig. S3b. Expanded COSY spectrum of luteolin-7-O-β-D-glucoside (APB) in DMSO-*d*<sub>6</sub>.

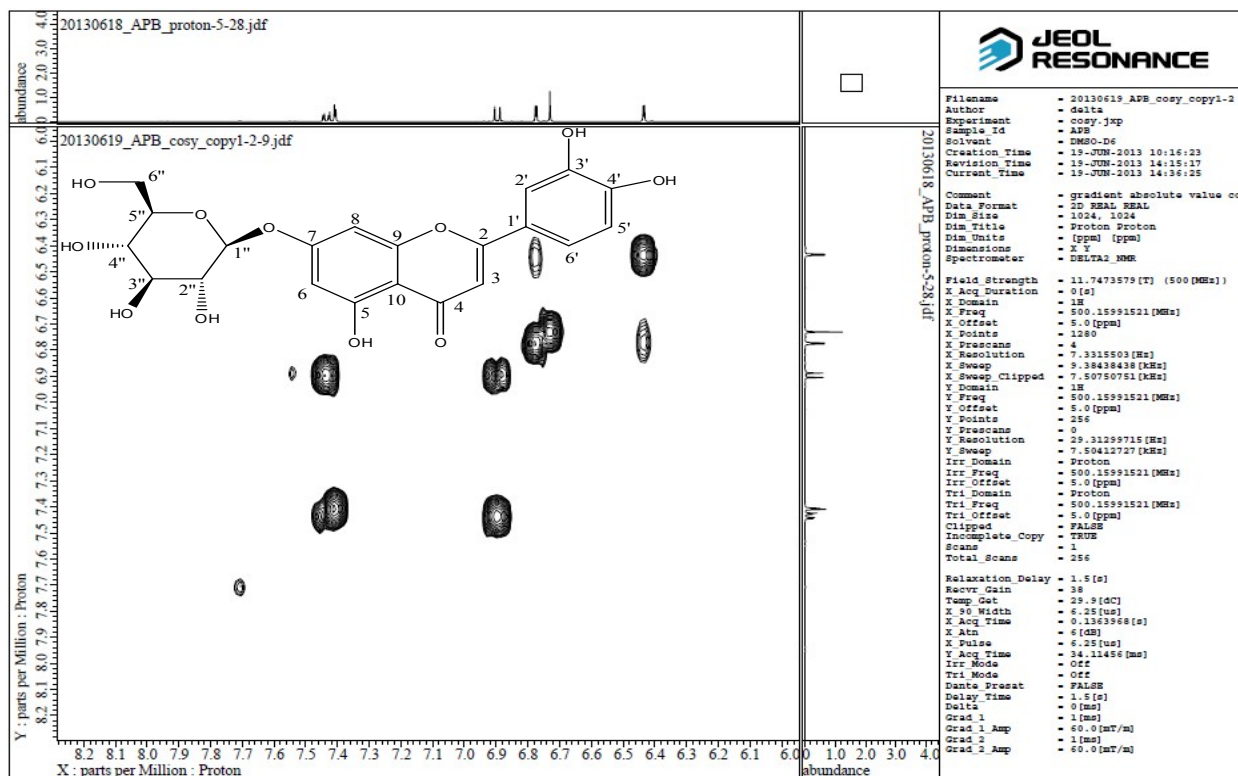

Fig. S3c. Expanded COSY spectrum of luteolin-7-O- $\beta$ -D-glucoside (APB) in DMSO- $d_6$ .

Fig. S4a. HMQC spectrum of luteolin-7-O- $\beta$ -D-glucoside (APB) in DMSO- $d_6$ .

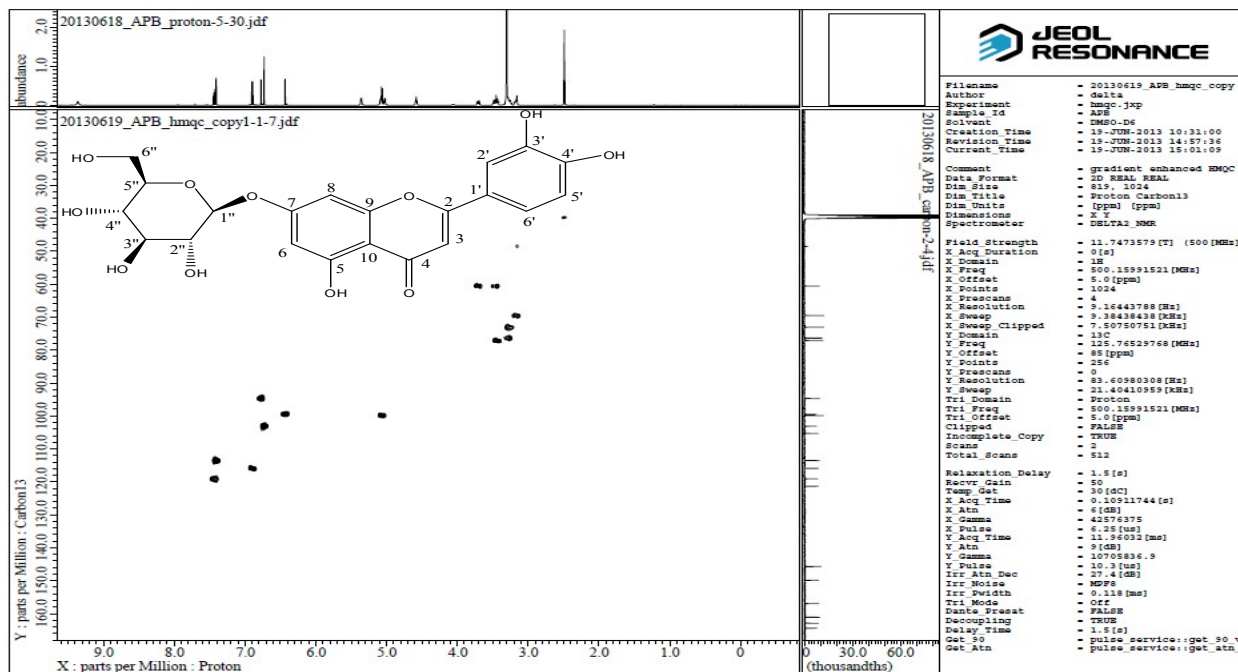

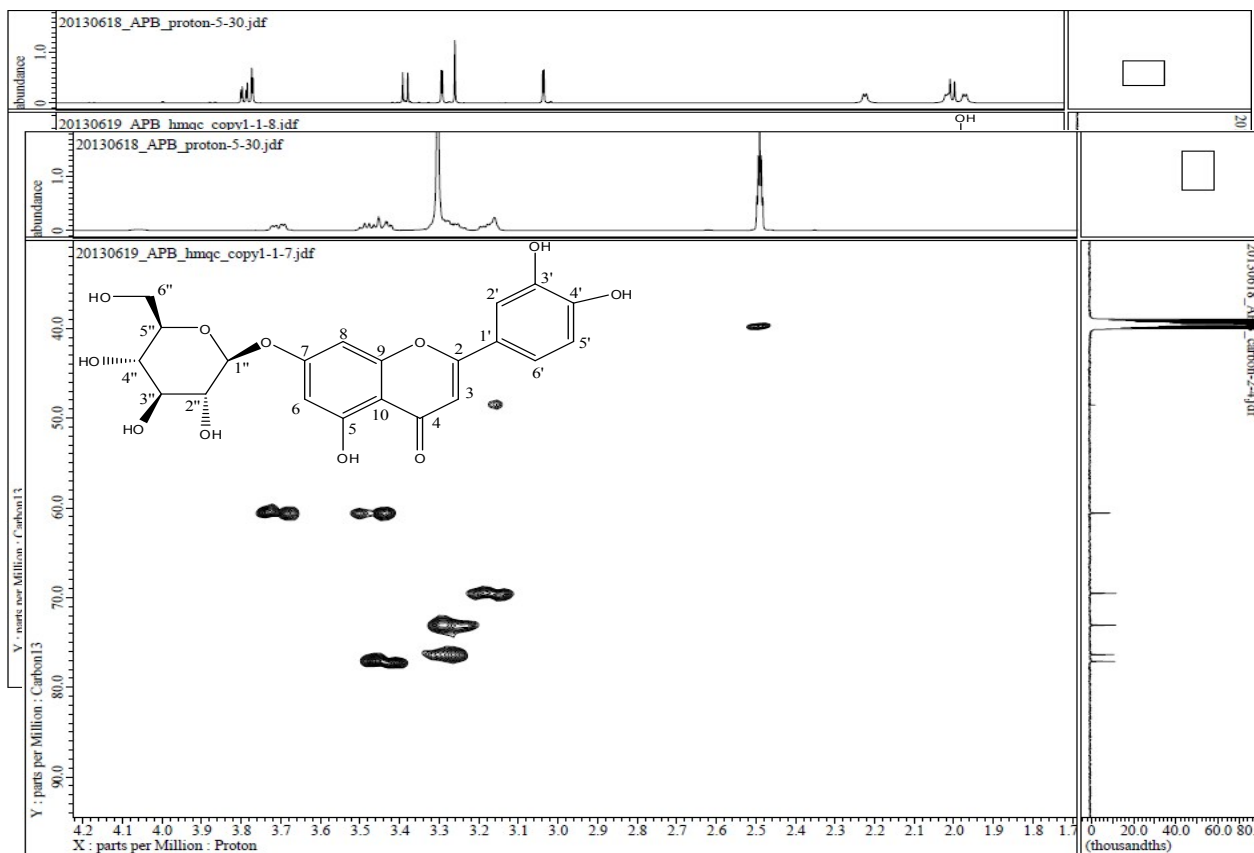

**Fig. S4b.** Expanded HMQC spectrum of luteolin-7-O-β-D-glucoside (APB) in DMSO-d<sub>6</sub>.

**Fig. S4c.** Expanded HMQC spectrum of luteolin-7-O-β-D-glucoside (APB) in DMSO-d<sub>6</sub>.

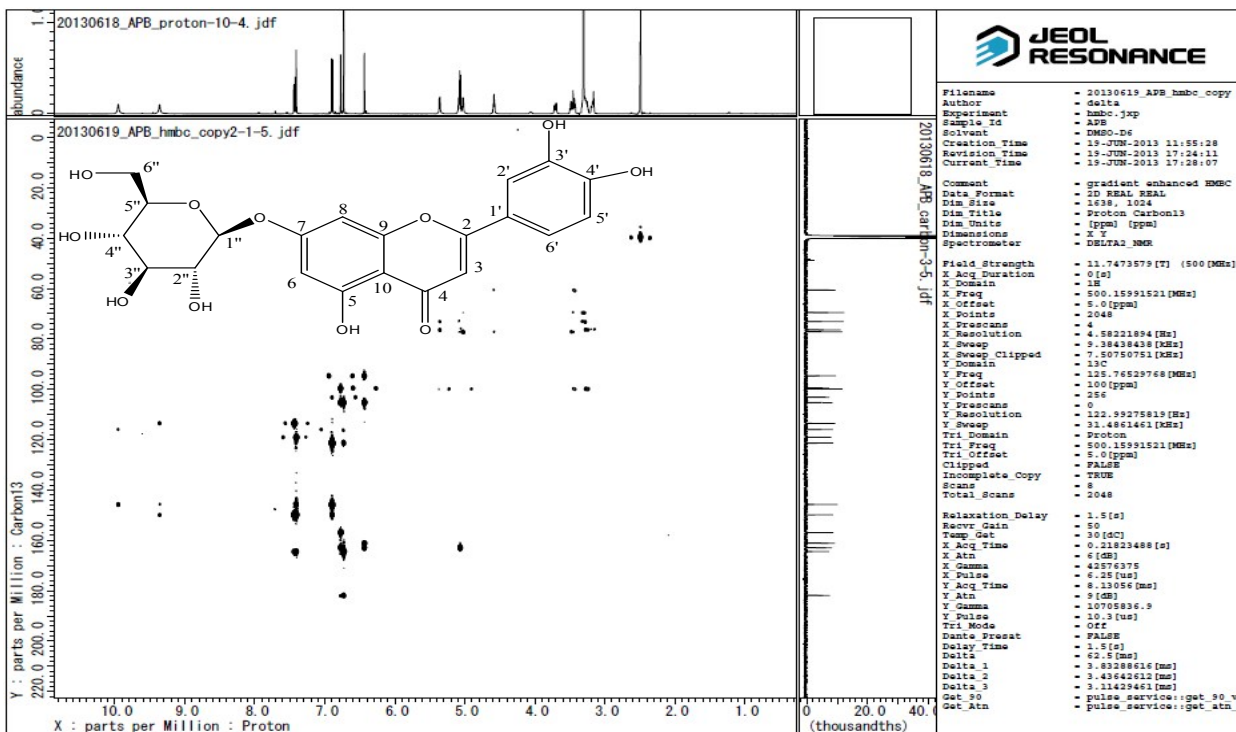

Fig. S5a. HMBC spectrum of luteolin-7-O- $\beta$ -D-glucoside (APB) in DMSO- $d_6$ .

Fig. S5b. Expanded HMBC spectrum of luteolin-7-O- $\beta$ -D-glucoside (APB) in DMSO- $d_6$ .

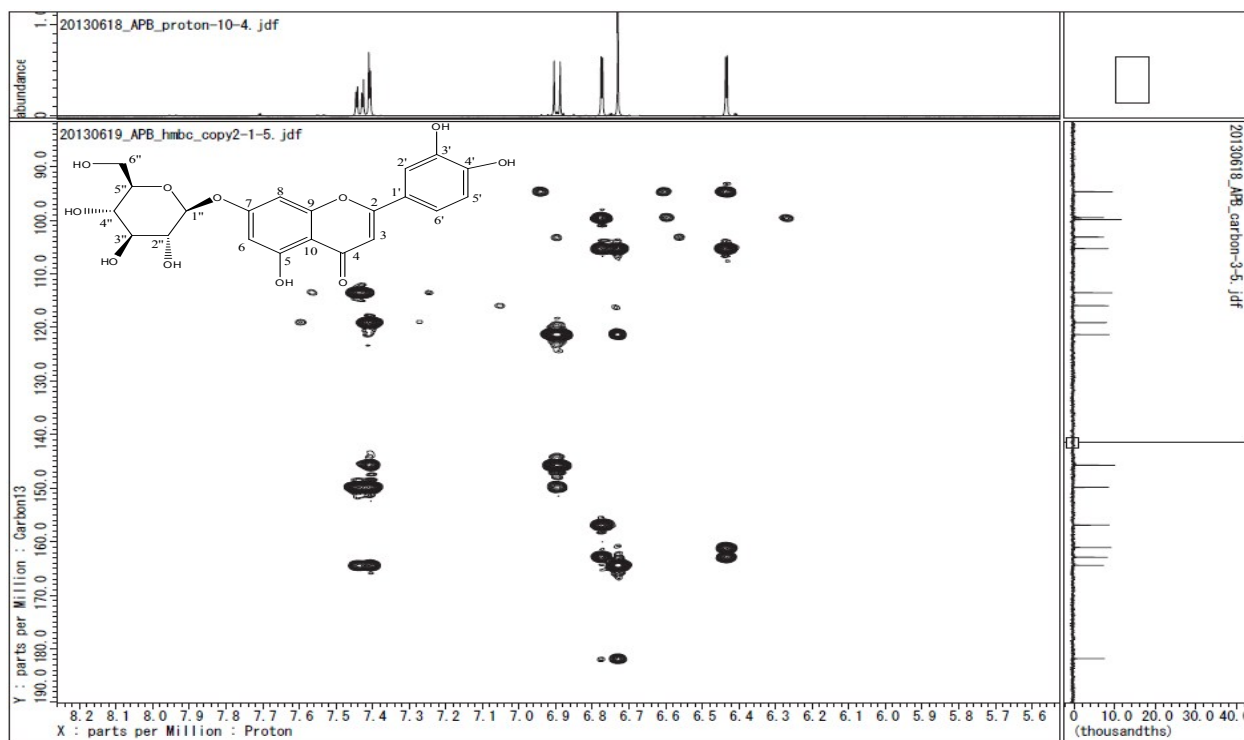



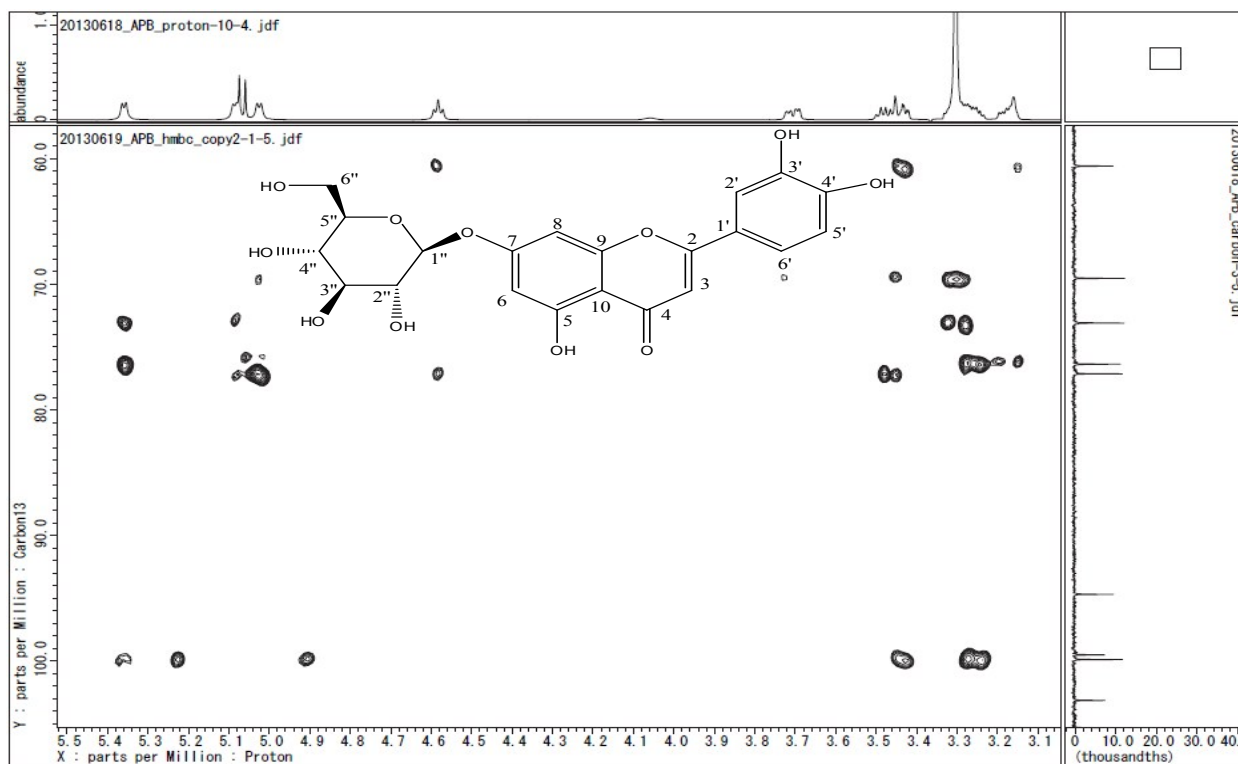

**Fig. S5c.** Expanded HMBC spectrum of luteolin-7-O- $\beta$ -D-glucoside (APB) in DMSO- $d_6$ .

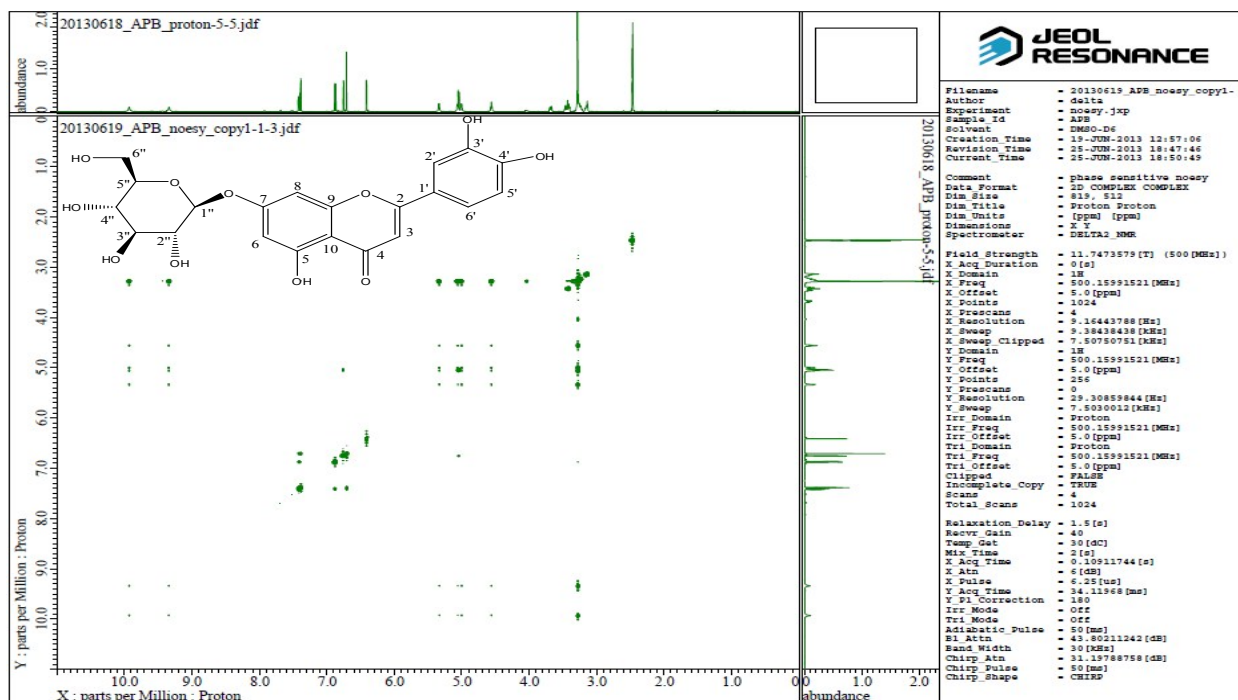

**Fig. S6.** NOESY spectrum of luteolin-7-O- $\beta$ -D-glucoside (APB) in DMSO- $d_6$ .

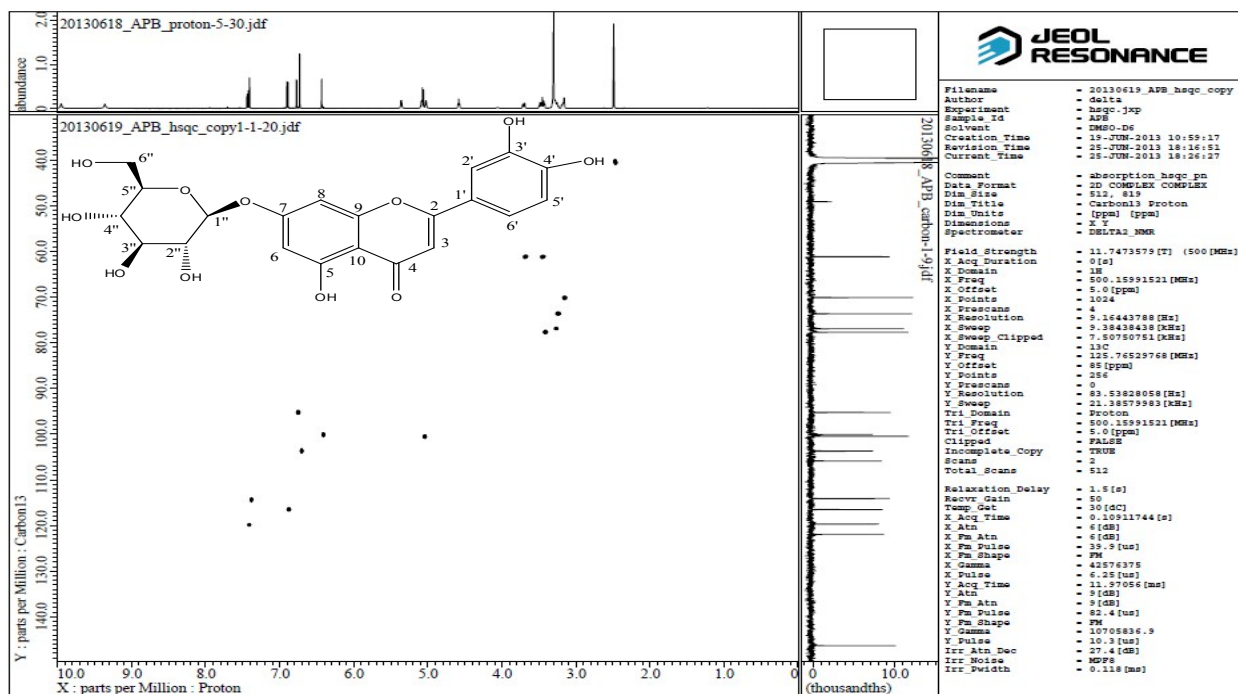

Fig. S7a. HSQC spectrum of luteolin-7-O- $\beta$ -D-glucoside (APB) in DMSO- $d_6$ .

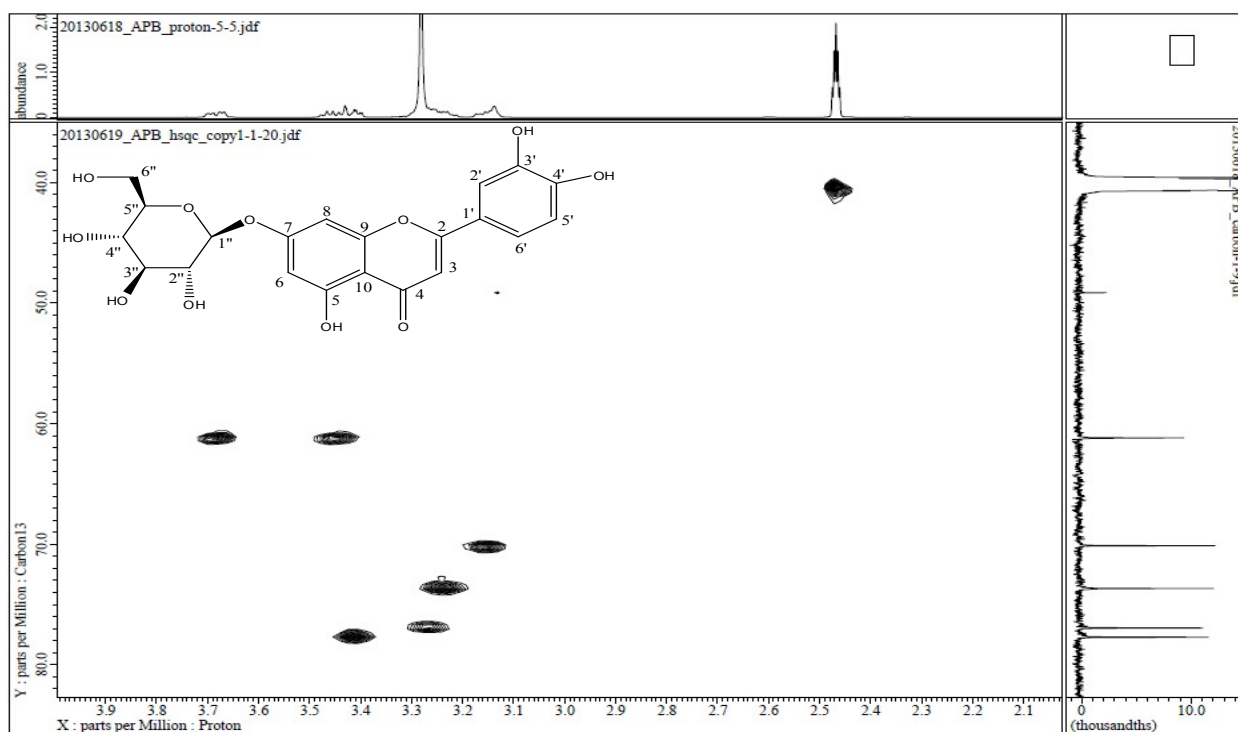

Fig. S7b. Expanded HSQC spectrum of luteolin-7-O- $\beta$ -D-glucoside (APB) in DMSO- $d_6$ .

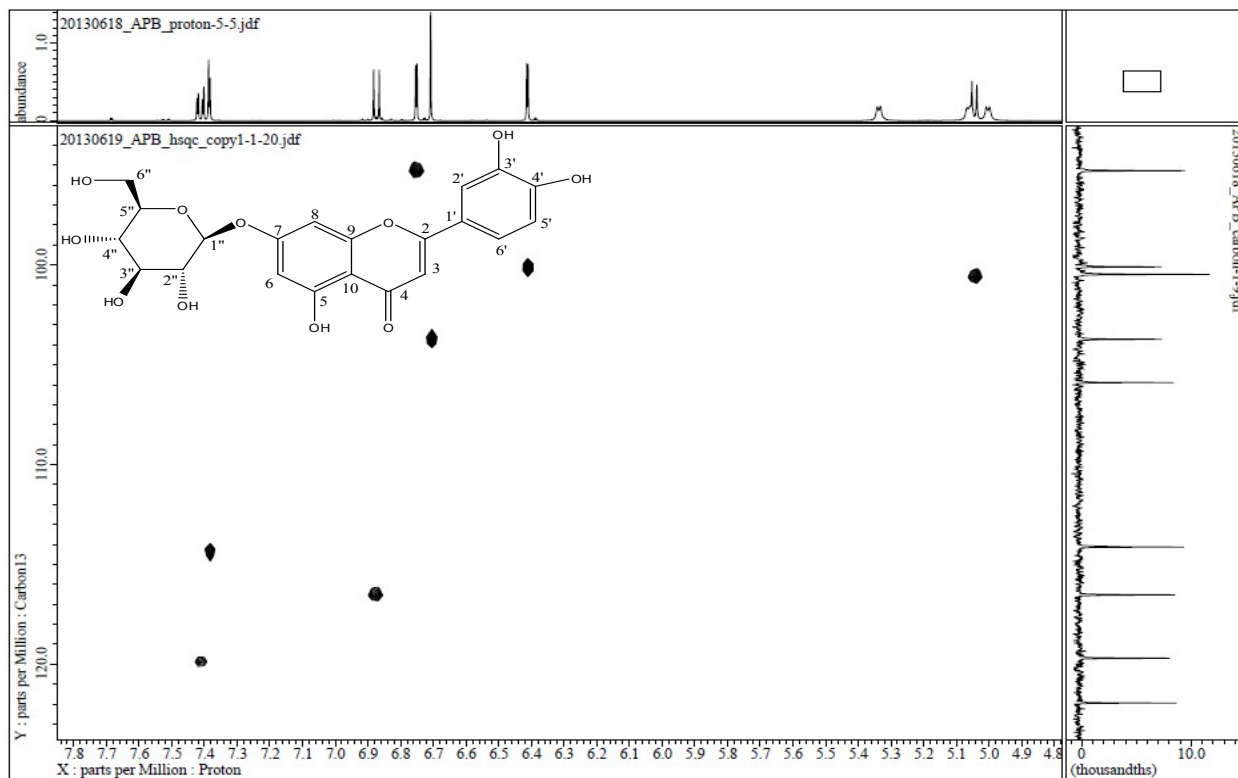

**Fig. S7c.** Expanded HSQC spectrum of luteolin-7-O- $\beta$ -D-glucoside (APB) in DMSO- $d_6$ .

**Fig. S8.** ESI-MS spectrum of luteolin-7-O- $\beta$ -D-glucoside (APB) in negative ion mode.

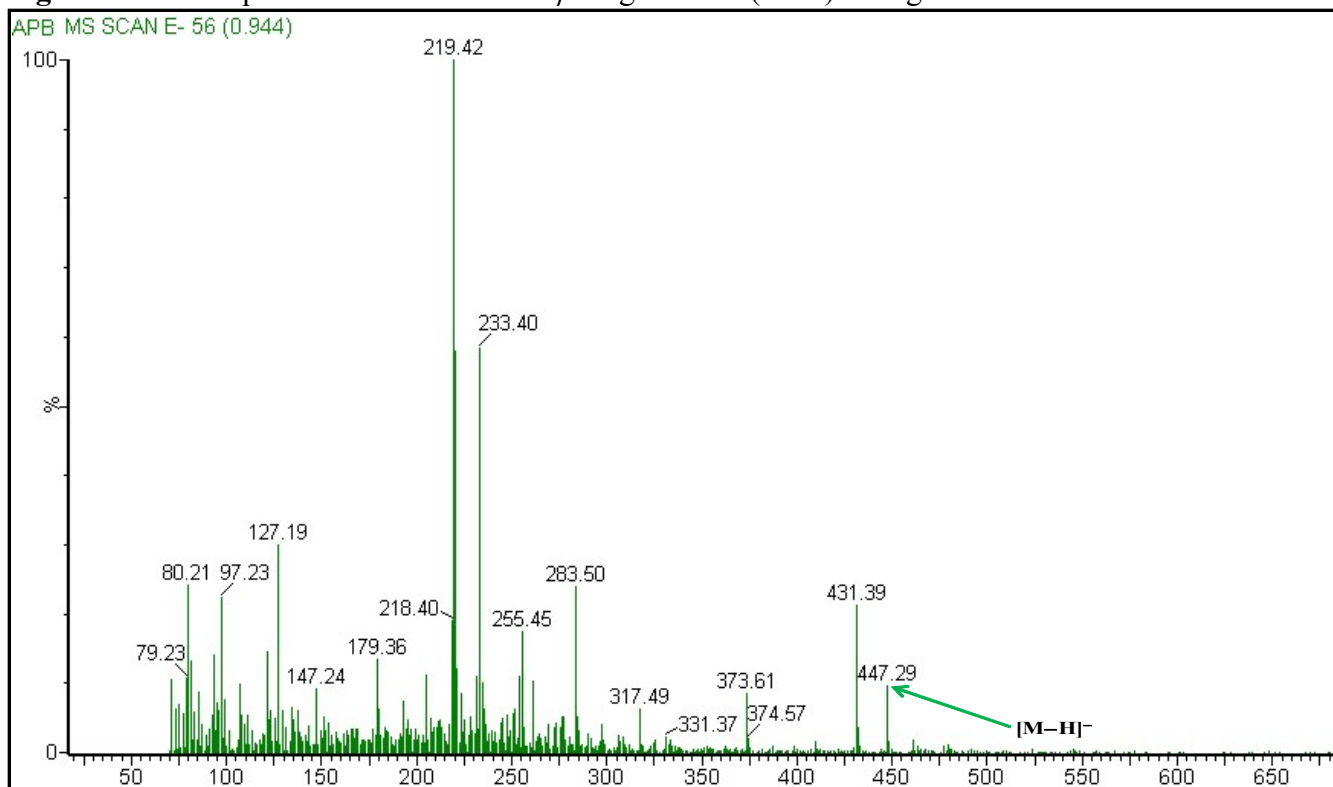

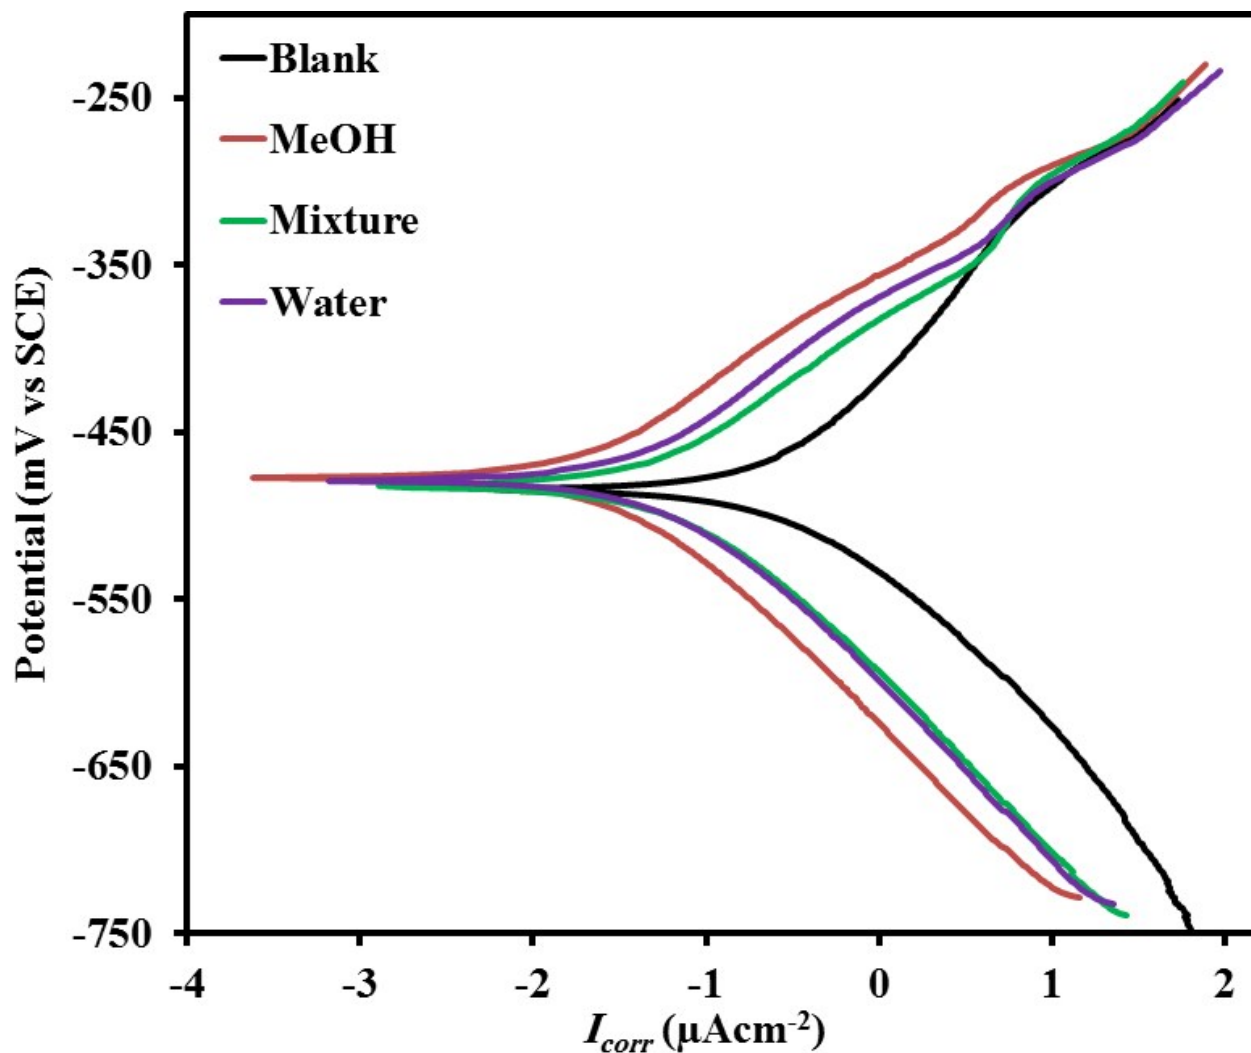

**Fig. S9.** Tafel plots in absence and presence of 600 ppm of MeOH, mixture and water extracts of *A. pseudocotula* in 1.0 M HCl.

**Table-S1:** Potentiodynamic polarization parameters obtained from Tafel plots for the corrosion of mild steel in 1.0 M HCl with 600 ppm of various extracts of *A. pseudocotula*.

| Inhibitors                                | $E_{corr}$<br>(mV) | $I_{corr}$<br>( $\mu\text{Acm}^{-2}$ ) | $\beta_a$<br>(mV/dec) | $\beta_c$<br>(mV/dec) | $R_p$ | IE %<br>Tafel | IE %<br>LPR |
|-------------------------------------------|--------------------|----------------------------------------|-----------------------|-----------------------|-------|---------------|-------------|
| Blank                                     | -486.6             | 213.0                                  | 99.85                 | -110.73               | 54.5  | -             | -           |
| MeOH                                      | -477.6             | 18.0                                   | 73.8                  | -64.6                 | 446.8 | 91.6          | 87.8        |
| Mixture<br>MeOH: H <sub>2</sub> O (85:15) | -482.7             | 50.0                                   | 75.0                  | -77.9                 | 206.3 | 76.5          | 73.6        |
| Water                                     | -478.7             | 37.9                                   | 78.4                  | -72.7                 | 250.3 | 82.2          | 78.2        |

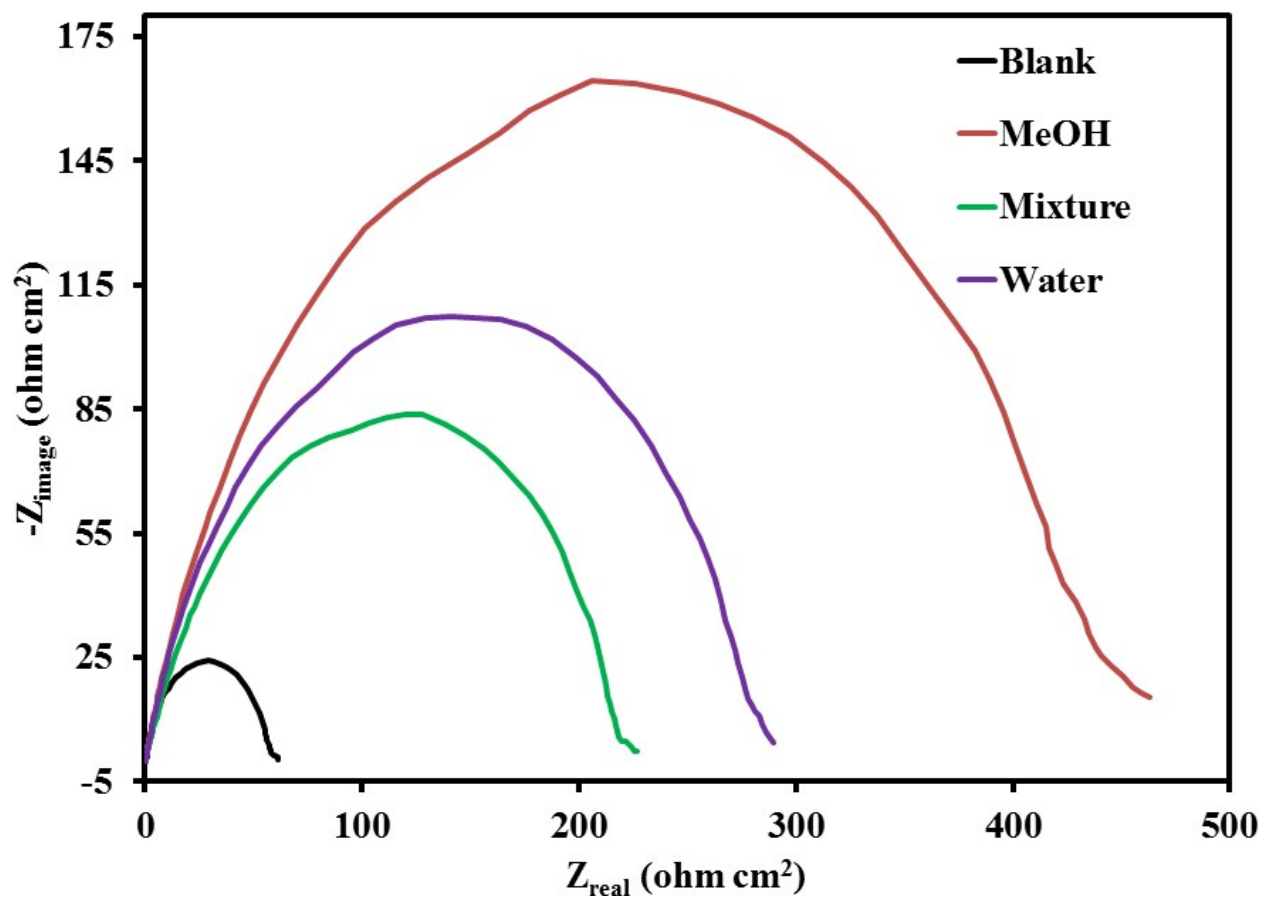

**Fig. S10.** Nyquist plots in absence and presence of 600 ppm of MeOH, mixture and water extracts of *A. pseudocotula* in 1.0 M HCl.

**Table-S2:** Electrochemical impedance parameters obtained from Nyquist plots for mild steel in 1.0 M HCl with 600 ppm of various extracts of *A. pseudocotula*.

| Inhibitors                                | $R_{ct}$ ( $\Omega$ cm <sup>2</sup> ) | $C_{dl}$ ( $\mu$ F cm <sup>-2</sup> ) | $\theta$ | IE % |
|-------------------------------------------|---------------------------------------|---------------------------------------|----------|------|
| Blank                                     | 57.1                                  | 533.0                                 | -        | -    |
| MeOH                                      | 445.3                                 | 145.0                                 | 0.87     | 87.2 |
| Mixture<br>MeOH: H <sub>2</sub> O (85:15) | 224.0                                 | 230.0                                 | 0.75     | 74.5 |
| Water                                     | 274.0                                 | 250.0                                 | 0.79     | 79.2 |

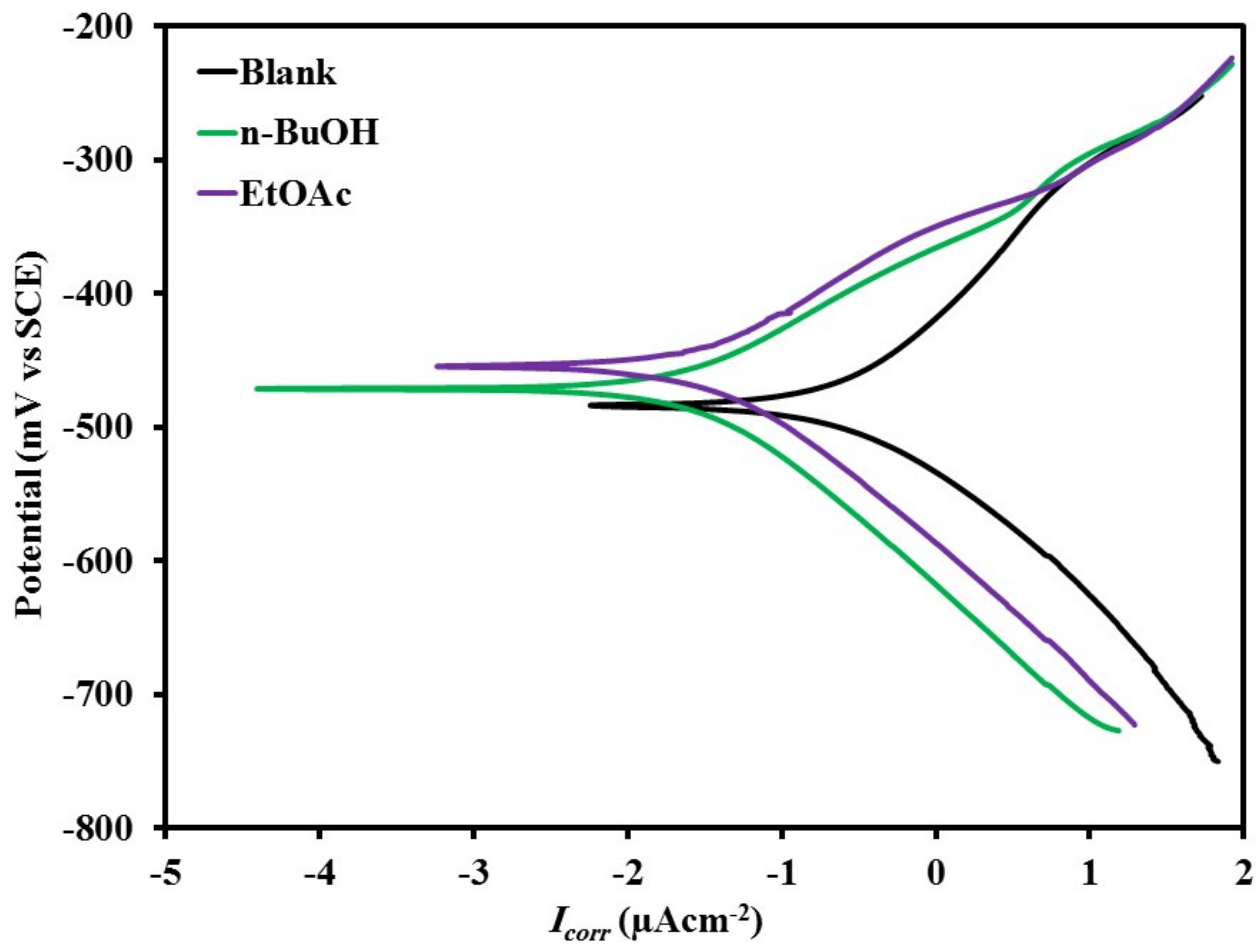

**Fig. S11.** Tafel plots in absence and presence of *n*-BuOH and EtOAc extracts of *A. pseudocotula* in 1.0 M HCl.

**Table-S3:** Potentiodynamic polarization parameters obtained from Tafel plots for the corrosion of mild steel in 1.0 M HCl with 600 ppm of *A. pseudocotula* various extracts.

| Inhibitors                | $E_{corr}$<br>(mV) | $I_{corr}$<br>( $\mu\text{Acm}^{-2}$ ) | $\beta_a$<br>(mV/dec) | $\beta_c$<br>(mV/dec) | $R_p$ | IE %<br>Tafel | IE %<br>LPR |
|---------------------------|--------------------|----------------------------------------|-----------------------|-----------------------|-------|---------------|-------------|
| Blank                     | - 486.6            | 213.0                                  | 99.85                 | - 110.73              | 54.5  | -             | -           |
| <i>n</i> -BuOH<br>extract | - 472.3            | 21.9                                   | 69.3                  | - 74.84               | 399.1 | 89.7          | 86.3        |
| EtOAc extract             | - 454.9            | 33.2                                   | 78.0                  | - 86.25               | 303.8 | 84.4          | 82.1        |

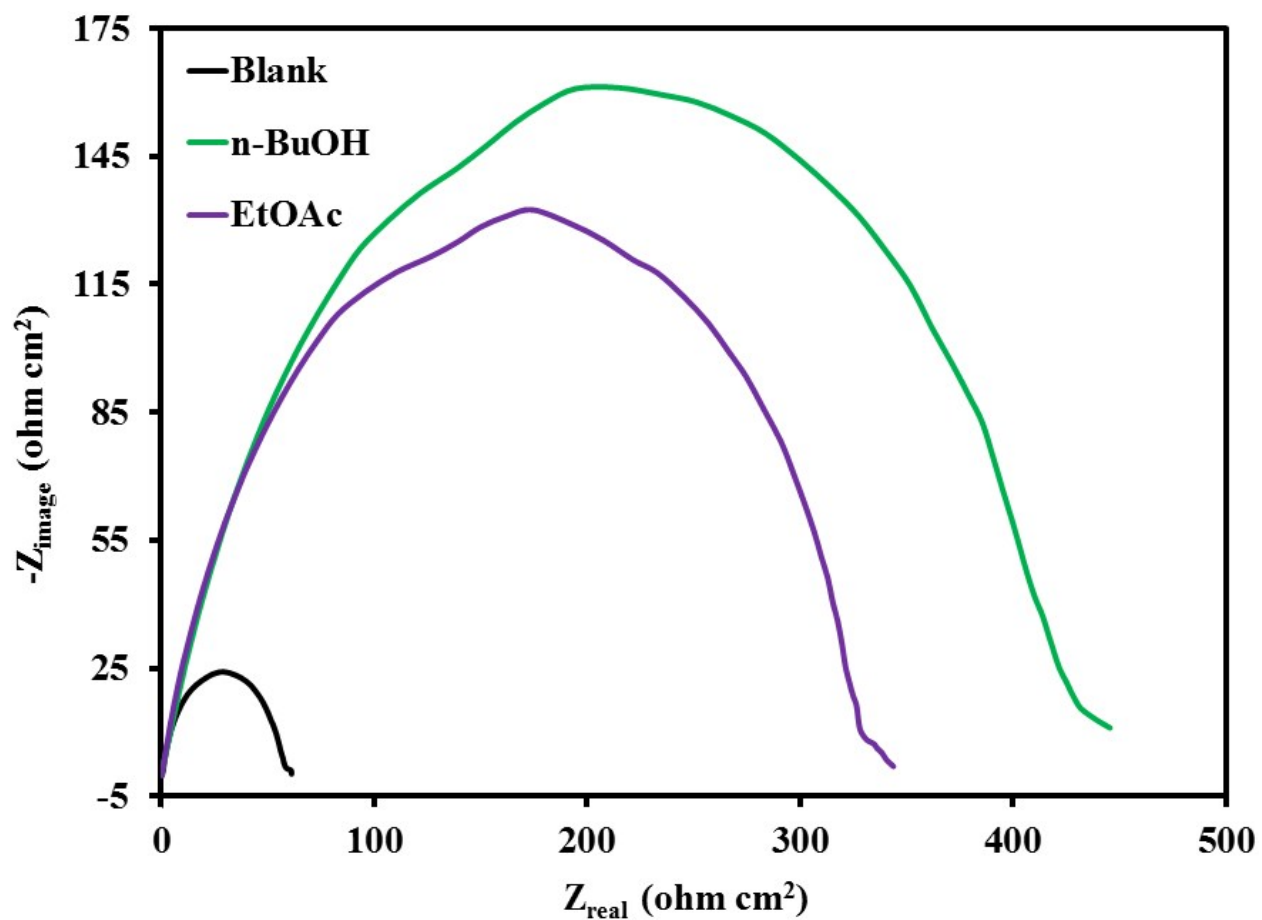

**Fig. S12.** Nyquist plots in absence and presence of *n*-BuOH and EtOAc extracts of *A. pseudocotula* in 1.0 M HCl.

**Table-S4:** Electrochemical impedance parameters obtained from Nyquist plots for mild steel in 1.0 M HCl with 600 ppm of *A. pseudocotula* various extracts.

| Inhibitors             | $R_{ct}$ ( $\Omega$ cm <sup>2</sup> ) | $C_{dl}$ ( $\mu$ F cm <sup>-2</sup> ) | $\theta$ | IE % |
|------------------------|---------------------------------------|---------------------------------------|----------|------|
| Blank                  | 57.1                                  | 533.0                                 | -        | -    |
| <i>n</i> -BuOH extract | 428.5                                 | 149.0                                 | 0.87     | 86.7 |
| EtOAc extract          | 331.4                                 | 142.0                                 | 0.83     | 82.8 |



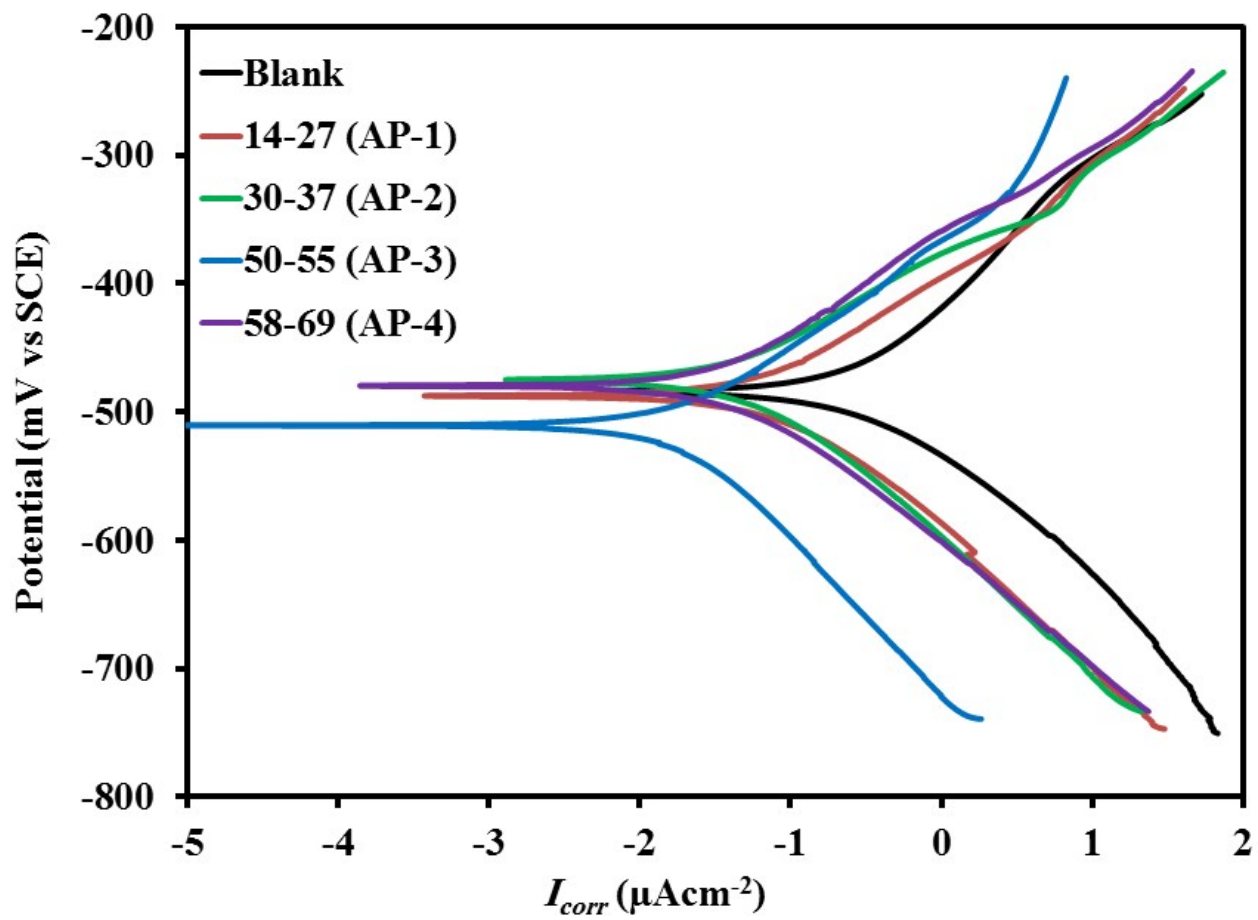

**Fig. S13.** Tafel plots in absence and presence of various fractions of *n*-BuOH extracts of *A. pseudocotula* in 1.0 M HCl.

**Table-S5:** Potentiodynamic polarization parameters obtained from Tafel plots for the corrosion of mild steel in 1.0 M HCl with 600 ppm of various fractions of *A. pseudocotula n*-BuOH extracts.

| Inhibitors | $E_{corr}$<br>(mV) | $I_{corr}$<br>( $\mu\text{Acm}^{-2}$ ) | $\beta_a$<br>(mV/dec) | $\beta_c$<br>(mV/dec) | $R_p$  | IE %<br>Tafel | IE %<br>LPR |
|------------|--------------------|----------------------------------------|-----------------------|-----------------------|--------|---------------|-------------|
| Blank      | -486.6             | 213.0                                  | 99.85                 | -110.73               | 54.5   | -             | -           |
| AP-1       | -487.9             | 55.5                                   | 74.7                  | -71.8                 | 193.9  | 73.9          | 71.9        |
| AP-2       | -476.3             | 47.8                                   | 81.8                  | -86.9                 | 210.9  | 77.6          | 74.2        |
| AP-3*      | -510.1             | 11.7                                   | 53.1                  | -66.0                 | 1007.5 | 94.5          | 94.6        |
| AP-4       | -479.3             | 38.2                                   | 86.2                  | -84.1                 | 279.3  | 82.1          | 80.5        |

\* Tested with 200 ppm.

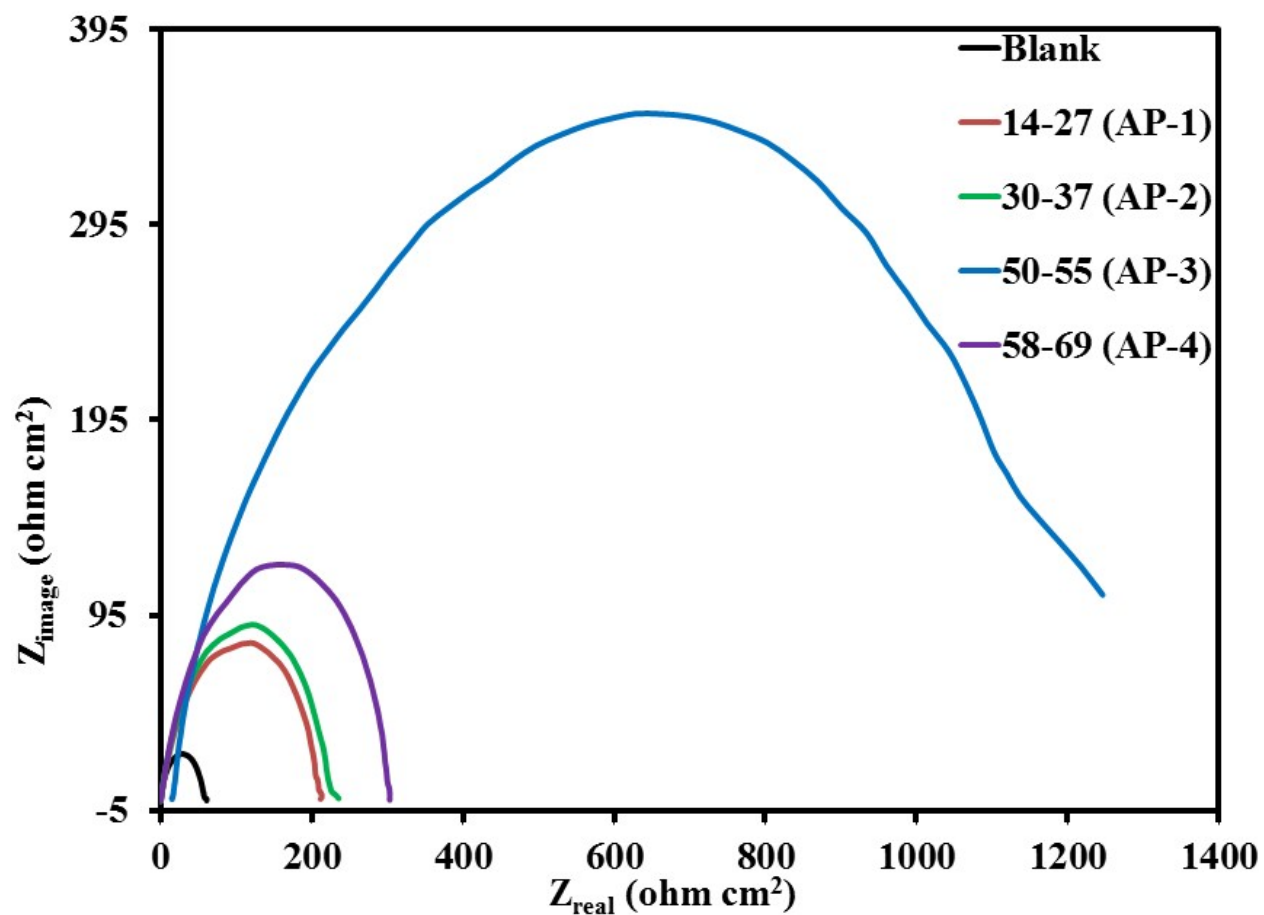

**Fig. S14.** Nyquist plots in absence and presence of various fractions of *n*-BuOH extracts of *A. pseudocotula* in 1.0 M HCl.

**Table-S6:** Electrochemical impedance parameters obtained from Nyquist plots for mild steel in 1.0 M HCl with 600 ppm of various fractions of *A. pseudocotula n*-BuOH extracts.

| Inhibitors | $R_{ct}$ ( $\Omega \text{ cm}^2$ ) | $C_{dl}$ ( $\mu\text{F cm}^{-2}$ ) | $\theta$ | IE % |
|------------|------------------------------------|------------------------------------|----------|------|
| Blank      | 57.1                               | 533.0                              | -        | -    |
| AP-1       | 217.6                              | 226                                | 0.74     | 73.8 |
| AP-2       | 224.8                              | 190                                | 0.75     | 74.6 |
| AP-3*      | 1040.0                             | 175.0                              | 0.95     | 94.5 |
| AP-4       | 309.4                              | 207                                | 0.82     | 81.6 |

\* Tested with 200 ppm.
